# Supplementary material for: Parafoveal Microvascular Alterations in Ocular and Non-Ocular Behҫet's Disease Evaluated With Optical Coherence Tomography Angiography
Source: PubMed Central journal article supplement — Invest Ophthalmol Vis Sci. 2021 Mar 5;62(3):8. doi: 10.1167/iovs.62.3.8 (PMC7938019; doi:10.1167/iovs.62.3.8), 2021-03-05
Supplement: iovs-62-3-8_s001.pdf [file iovs-62-3-8_s001.pdf]

**Supplementary Table S1.** Current immunosuppressive systemic medication (number of patients per drug)

|                  | <b>BU (n=23)</b> | <b>NOBD (n=23)</b> |
|------------------|------------------|--------------------|
| Celecoxib        | 0                | 1                  |
| Etoricoxib       | 0                | 1                  |
| Plaquenil        | 0                | 2                  |
| Colchicine       | 10               | 15                 |
| Thalidomide      | 1                | 1                  |
| Prednison        | 2                | 3                  |
| Azathioprine     | 6                | 3                  |
| Mycofenolaat     | 1                | 0                  |
| Methotrexaat     | 3                | 2                  |
| Ciclosporine     | 1                | 0                  |
| Adalimumab       | 8                | 1                  |
| Interferon alpha | 1                | 0                  |
| Infliximab       | 4                | 5                  |
| Rituximab        | 1                | 0                  |

*BU: Behçet uveitis; NOBD: non-ocular Behçet's disease.*
