# Supplementary material for: Parafoveal Microvascular Alterations in Ocular and Non-Ocular Behҫet's Disease Evaluated With Optical Coherence Tomography Angiography
Source: PubMed Central journal article supplement — Invest Ophthalmol Vis Sci. 2021 Mar 5;62(3):8. doi: 10.1167/iovs.62.3.8 (PMC7938019; doi:10.1167/iovs.62.3.8), 2021-03-05
Supplement: iovs-62-3-8_s002.pdf [file iovs-62-3-8_s002.pdf]

**Supplementary Table S2.** Ophthalmological features of the patients with Behçet uveitis (BU)

| Patient number | Study eye | Unilateral or bilateral uveitis | Uveitis classification <sup>x</sup> | Central or peripheral vasculitis | Latest inflammation | Prior CME | Current CME | Other ophthalmological abnormalities on OCT        | Glaucoma |
|----------------|-----------|---------------------------------|-------------------------------------|----------------------------------|---------------------|-----------|-------------|----------------------------------------------------|----------|
| 1              | OD        | Bilateral                       | Pan                                 | Peripheral                       | 2013                | Yes       | No          | ERM                                                | No       |
| 2              | OD        | Bilateral                       | Anterior                            | N.A.                             | 2017                | No        | No          | No                                                 | No       |
| 3              | OD        | Bilateral                       | Pan                                 | Peripheral                       | 2008                | Yes       | No          | Choroidal folds, mild ERM, degenerative microcysts | Yes      |
| 4              | OS        | Bilateral                       | Anterior                            | N.A.                             | 2011                | Yes       | Yes         | Retinal atrophy                                    | No       |
| 5              | OD        | Bilateral                       | Pan                                 | Peripheral                       | 2008                | Yes       | No          | Choroidal folds, mild ERM                          | Yes      |
| 6              | OS        | Bilateral                       | Pan                                 | Peripheral                       | 2014                | Yes       | No          | Irregular ILM                                      | No       |
| 7              | OD        | Bilateral                       | Pan                                 | Peripheral °                     | 2018                | No        | No          | ERM                                                | Yes      |
| 8              | OD        | Unilateral                      | Vasculitis                          | Central °                        | 2013                | No        | No          | No                                                 | No       |
| 9              | OD        | Unilateral                      | Pan                                 | Peripheral °                     | 2000                | Yes       | No          | Retinal atrophy                                    | No       |
| 10             | OS        | Unilateral                      | Pan                                 | Peripheral                       | 2016                | No        | No          | ERM                                                | Yes      |
| 11             | OS        | Unilateral                      | Pan                                 | Peripheral                       | 2018*               | Yes       | Yes         | Retinal atrophy, ERM                               | Yes      |
| 12             | OD        | Bilateral                       | Vasculitis                          | Central                          | 2018                | Yes       | No          | Inner retina atrophy superior                      | No       |
| 13             | OS        | Unilateral                      | Pan                                 | Peripheral °                     | 2016                | Yes       | No          | Retinal atrophy                                    | No       |
| 14             | OS        | Bilateral                       | Anterior                            | N.A.                             | 2002                | No        | No          | Large foveal dip                                   | No       |
| 15             | OD        | Bilateral                       | Vasculitis                          | Peripheral °                     | 2011                | No        | No          | Retinal atrophy, EZ disturbances fovea             | No       |
| 16             | OS        | Bilateral                       | Anterior                            | N.A.                             | 2016                | No        | No          | No                                                 | OHT      |
| 17             | OS        | Bilateral                       | Anterior                            | N.A.                             | 2005                | No        | No          | No                                                 | No       |
| 18             | OD        | Bilateral                       | Pan                                 | Central °                        | 2018                | Yes       | No          | No                                                 | No       |
| 19             | OS        | Bilateral                       | Vasculitis                          | Central °                        | 2010                | Yes       | No          | Retinal atrophy                                    | No       |
| 20             | OD        | Bilateral                       | Vasculitis                          | Central °                        | 2006                | Yes       | No          | No                                                 | No       |
| 21             | OD        | Bilateral                       | Pan                                 | Peripheral                       | 2018                | No        | No          | No                                                 | No       |

BU: Behçet uveitis; CME: cystoid macular edema; OCT: optical coherence tomography; ERM: Epiretinal membrane; ILM: internal limiting membrane; OHT: ocular hypertension; EZ: ellipsoid zone; N.A.: not applicable.

<sup>x</sup> Note that retinal vasculitis was observed in all patients with uveitis classifications panuveitis and vasculitis.

<sup>o</sup> Occlusive vasculitis

\*Currently active
